# Supplementary material
Source: publisher figshare collection journal article supplement (https://sage.figshare.com/ndownloader/files/14639804)
Supplement: Supplementary file 1 [file 14639804]

Appendix 4  
NECS2016 Questionnaire structure

| No | Section                                 | Information acquired                                                                                                                                                                                                                                                                                                                                                                                                                                                                                                                                                            |
|----|-----------------------------------------|---------------------------------------------------------------------------------------------------------------------------------------------------------------------------------------------------------------------------------------------------------------------------------------------------------------------------------------------------------------------------------------------------------------------------------------------------------------------------------------------------------------------------------------------------------------------------------|
| A  | Background details                      | <ul style="list-style-type: none"> <li>• Gender</li> <li>• Age</li> <li>• Occupation</li> <li>• Ethnicity</li> <li>• Religion</li> <li>• Highest education level</li> <li>• Marital status</li> </ul>                                                                                                                                                                                                                                                                                                                                                                           |
| B  | E-cigarette use, pattern and perception | <ul style="list-style-type: none"> <li>• User status</li> <li>• Age of initiation</li> <li>• Reasons for use</li> <li>• Frequency of use</li> <li>• Types of device and cost</li> <li>• E-cigarette liquid (preferred flavour type, amount, source, brand, preferred nicotine strength and cost)</li> <li>• Sharing of E-cigarette liquid</li> <li>• Most common places for E-cigarette use</li> <li>• Side effects</li> <li>• Quit attempt</li> <li>• Level of addictiveness</li> <li>• Method used for successful quitting</li> <li>• Level of nicotine withdrawal</li> </ul> |
| C  | Tobacco smoking status                  | <ul style="list-style-type: none"> <li>• Smoking status</li> <li>• Age of smoking initiation</li> <li>• Cost of cigarette (monthly cost)</li> <li>• Level of cigarette addiction</li> <li>• Quit attempt</li> <li>• Method used for successful quitting</li> <li>• Level of nicotine withdrawal</li> </ul>                                                                                                                                                                                                                                                                      |
| D  | Dual users                              | <ul style="list-style-type: none"> <li>• More preferred use between E-cigarette and cigarette</li> </ul>                                                                                                                                                                                                                                                                                                                                                                                                                                                                        |
| E  | Second-hand E-cigarette exposure        | <ul style="list-style-type: none"> <li>• Exposure to E-cigarette at home and work</li> <li>• Regulation on E-cigarette use at home and work</li> </ul>                                                                                                                                                                                                                                                                                                                                                                                                                          |
| F  | Media                                   | <ul style="list-style-type: none"> <li>• Information and source of information on E-cigarette</li> </ul>                                                                                                                                                                                                                                                                                                                                                                                                                                                                        |

|   |                             |                                                                                                      |
|---|-----------------------------|------------------------------------------------------------------------------------------------------|
| G | Perception on E-cigarette   | <ul style="list-style-type: none"> <li>• Perception of users and non-users on E-cigarette</li> </ul> |
| H | E-cigarette liquid analysis | <ul style="list-style-type: none"> <li>• Presence of nicotine and its concentration</li> </ul>       |

---
